# Supplementary material
Source: PubMed Central journal article supplement (PMC6306686)
Supplement: Supp_Fig1.pdf [file Supp_Fig1.pdf]

## Supplementary Data

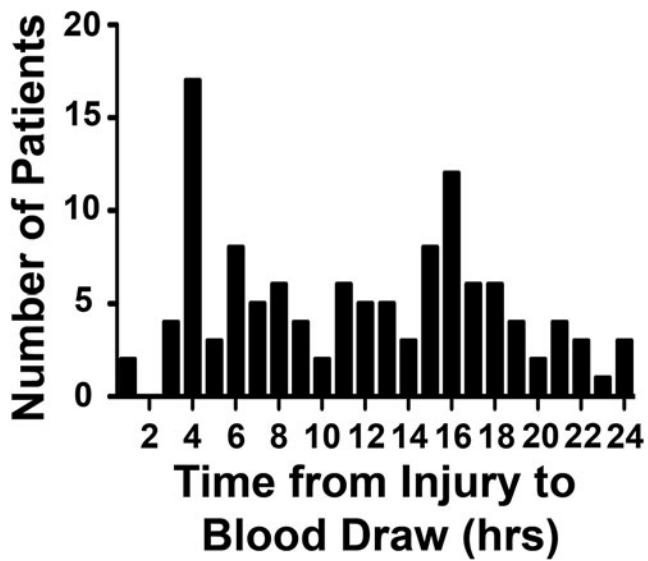

**SUPPLEMENTARY FIG. S1.** Time from injury to blood draw. Blood for all patients was taken within 24 hours of hospital admission. Bars indicate the number of patients that had blood draw performed at each hour between 0 and 24 hours after admission, with blood draw most commonly performed at 4 or 16 hours.
