# Supplementary material
Source: PubMed Central journal article supplement (PMC6306686)
Supplement: Supp_Table1.pdf [file Supp_Table1.pdf]

| 1st Batch Run (n = 62 samples)                               |                               |                       | 2nd Batch Run (n = 72 samples)                               |                               |                     |
|--------------------------------------------------------------|-------------------------------|-----------------------|--------------------------------------------------------------|-------------------------------|---------------------|
|                                                              | Lower Limit of Quantification | Least Detectable Dose |                                                              | Lower Limit of Quantification | Least Detectable Do |
| Adiponectin                                                  | 0.06 ug/mL                    | 0.017 ug/mL           | Adiponectin                                                  | 0.21 ug/mL                    | 0.27 ug/mL          |
| Alpha-1-Antitrypsin (AAT)                                    | 0.016 mg/mL                   | 0.0076 mg/mL          | Alpha-1-Antitrypsin (AAT)                                    | 0.05 mg/mL                    | 0.012 mg/mL         |
| Alpha-2-Macroglobulin (A2Macro)                              | 0.017 mg/mL                   | 0.02 mg/mL            | Alpha-2-Macroglobulin (A2Macro)                              | 0.055 mg/mL                   | 0.049 mg/mL         |
| Alpha-Fetoprotein (AFP)                                      | 0.55 ng/mL                    | 0.068 ng/mL           | Alpha-Fetoprotein (AFP)                                      | 0.56 ng/mL                    | 0.33 ng/mL          |
| Apolipoprotein(a) (Lp(a))                                    | 4.6 ug/mL                     | 0.99 ug/mL            | Apolipoprotein(a) (Lp(a))                                    | 1.9 ug/mL                     | 0.63 ug/mL          |
| Apolipoprotein A-I (Apo A-I)                                 | 0.06 mg/mL                    | 0.016 mg/mL           | Apolipoprotein A-I (Apo A-I)                                 | 0.025 mg/mL                   | 0.037 mg/mL         |
| Apolipoprotein A-II (Apo A-II)                               | 14 ng/mL                      | 11 ng/mL              | Apolipoprotein A-II (Apo A-II)                               | 14 ng/mL                      | 9.5 ng/mL           |
| Apolipoprotein C-I (Apo C-I)                                 | 22 ng/mL                      | 6.2 ng/mL             | Apolipoprotein C-I (Apo C-I)                                 | 9.9 ng/mL                     | 7 ng/mL             |
| Apolipoprotein C-III (Apo C-III)                             | 11 ug/mL                      | 2.4 ug/mL             | Apolipoprotein C-III (Apo C-III)                             | 11 ug/mL                      | 3.4 ug/mL           |
| Apolipoprotein H (Apo H)                                     | 62 ug/mL                      | 15 ug/mL              | Apolipoprotein H (Apo H)                                     | 43 ug/mL                      | 27 ug/mL            |
| Beta-2-Microglobulin (B2M)                                   | 0.01 ug/mL                    | 0.0091 ug/mL          | Beta-2-Microglobulin (B2M)                                   | 0.095 ug/mL                   | 0.1 ug/mL           |
| Brain-Derived Neurotrophic Factor (BDNF)                     | 0.036 ng/mL                   | 0.023 ng/mL           | Brain-Derived Neurotrophic Factor (BDNF)                     | 0.069 ng/mL                   | 0.026 ng/mL         |
| C-Reactive Protein (CRP)                                     | 0.039 ug/mL                   | 0.017 ug/mL           | C-Reactive Protein (CRP)                                     | 0.026 ug/mL                   | 0.016 ug/mL         |
| Cancer Antigen 125 (CA-125)                                  | 3.8 U/mL                      | 2.3 U/mL              | Cancer Antigen 125 (CA-125)                                  | 8.7 U/mL                      | 2.3 U/mL            |
| Cancer Antigen 19-9 (CA-19-9)                                | 7 U/mL                        | 11 U/mL               | Cancer Antigen 19-9 (CA-19-9)                                | 3 U/mL                        | 0.86 U/mL           |
| Carcinoembryonic Antigen (CEA)                               | 0.19 ng/mL                    | 0.14 ng/mL            | Carcinoembryonic Antigen (CEA)                               | 0.56 ng/mL                    | 0.18 ng/mL          |
| CD 40 antigen (CD40)                                         | 0.016 ng/mL                   | 0.018 ng/mL           | CD 40 antigen (CD40)                                         | 0.032 ng/mL                   | 0.014 ng/mL         |
| CD40 Ligand (CD40-L)                                         | 0.016 ng/mL                   | 0.018 ng/mL           | CD40 Ligand (CD40-L)                                         | 0.091 ng/mL                   | 0.033 ng/mL         |
| Complement C3 (C3)                                           | 0.02 mg/mL                    | 0.0032 mg/mL          |                                                              |                               |                     |
| Creatine Kinase-MB (CK-MB)                                   | 0.35 ng/mL                    | 0.18 ng/mL            | Erythropoietin (EPO)                                         | 17 mIU/mL                     | 2.3 mIU/mL          |
| EN-RAGE                                                      | 0.38 ng/mL                    | 0.18 ng/mL            | EN-RAGE                                                      | 2.5 ng/mL                     | 1.4 ng/mL           |
| Eotaxin-1                                                    | 145 pg/mL                     | 9.7 pg/mL             | Eotaxin-1                                                    | 85 pg/mL                      | 55 pg/mL            |
| Epithelial-Derived Neutrophil-Activating Protein 78 (ENA-78) | 0.084 ng/mL                   | 0.015 ng/mL           | Epithelial-Derived Neutrophil-Activating Protein 78 (ENA-78) | 0.063 ng/mL                   | 0.019 ng/mL         |
| Factor VII                                                   | 3.8 ng/mL                     | 6.2 ng/mL             | Factor VII                                                   | 4.6 ng/mL                     | 2.4 ng/mL           |
| Ferritin (FRTN)                                              | 4.3 ng/mL                     | 2.5 ng/mL             | Ferritin (FRTN)                                              | 2.8 ng/mL                     | 0.96 ng/mL          |
| Fibrinogen                                                   | 0.049 mg/mL                   | 0.044 mg/mL           | Fibrinogen                                                   | 0.042 mg/mL                   | 0.0085 mg/mL        |
| Glucagon-like Peptide 1, active (GLP-1 active)               | 13 pg/mL                      | 6.9 pg/mL             | Matrix Metalloproteinase-2 (MMP-2)                           | 10 ng/mL                      | 5.9 ng/mL           |
| Granulocyte Colony-Stimulating Factor (G-CSF)                | 5.4 pg/mL                     | 3.6 pg/mL             | Granulocyte Colony-Stimulating Factor (G-CSF)                | 48 pg/mL                      | 8.4 pg/mL           |
| Granulocyte-Macrophage Colony-Stimulating Factor (GM-CSF)    | 88 pg/mL                      | 16 pg/mL              | Granulocyte-Macrophage Colony-Stimulating Factor (GM-CSF)    | 21 pg/mL                      | 18 pg/mL            |

| 1st Batch Run (n = 62 samples)                    |                               |                       | 2nd Batch Run (n = 72 samples)                    |                               |                       |
|---------------------------------------------------|-------------------------------|-----------------------|---------------------------------------------------|-------------------------------|-----------------------|
|                                                   | Lower Limit of Quantification | Least Detectable Dose |                                                   | Lower Limit of Quantification | Least Detectable Dose |
| <b>Growth Hormone (GH)</b>                        | 0.15 ng/mL                    | 0.027 ng/mL           | <b>Growth Hormone (GH)</b>                        | 0.14 ng/mL                    | 0.067 ng/mL           |
| <b>Haptoglobin</b>                                | 0.064 mg/mL                   | 0.024 mg/mL           | <b>Haptoglobin</b>                                | 0.016 mg/mL                   | 0.015 mg/mL           |
| <b>Human Chorionic Gonadotropin beta (hCG)</b>    | 2.3 mIU/mL                    | 1.2 mIU/mL            | <b>Human Chorionic Gonadotropin beta (hCG)</b>    | 1.1 mIU/mL                    | 1.2 mIU/mL            |
| <b>Immunoglobulin A (IgA)</b>                     | 0.056 mg/mL                   | 0.0069 mg/mL          | <b>Immunoglobulin A (IgA)</b>                     | 0.096 mg/mL                   | 0.027 mg/mL           |
| <b>Immunoglobulin E (IgE)</b>                     | 18 U/mL                       | 2.1 U/mL              | <b>Immunoglobulin E (IgE)</b>                     | 6.1 U/mL                      | 4.2 U/mL              |
| <b>Immunoglobulin M (IgM)</b>                     | 0.094 mg/mL                   | 0.073 mg/mL           | <b>Immunoglobulin M (IgM)</b>                     | 0.085 mg/mL                   | 0.088 mg/mL           |
| <b>Insulin</b>                                    | 0.21 uIU/mL                   | 0.017 uIU/mL          | <b>Insulin</b>                                    | 0.22 uIU/mL                   | 0.21 uIU/mL           |
| <b>Intercellular Adhesion Molecule 1 (ICAM-1)</b> | 1.3 ng/mL                     | 1.8 ng/mL             | <b>Intercellular Adhesion Molecule 1 (ICAM-1)</b> | 4.1 ng/mL                     | 2.8 ng/mL             |
| <b>Interferon gamma (IFN-gamma)</b>               | 1.5 pg/mL                     | 2.4 pg/mL             | <b>Interferon gamma (IFN-gamma)</b>               | 2.5 pg/mL                     | 1.5 pg/mL             |
| <b>Interleukin-1 alpha (IL-1 alpha)</b>           | 0.002 ng/mL                   | 0.0015 ng/mL          | <b>Interleukin-1 alpha (IL-1 alpha)</b>           | 0.0013 ng/mL                  | 0.00039 ng/mL         |
| <b>Interleukin-1 beta (IL-1 beta)</b>             | 2.8 pg/mL                     | 1.5 pg/mL             | <b>Interleukin-1 beta (IL-1 beta)</b>             | 6.6 pg/mL                     | 2.3 pg/mL             |
| <b>Interleukin-1 receptor antagonist (IL-1ra)</b> | 95 pg/mL                      | 49 pg/mL              | <b>Interleukin-1 receptor antagonist (IL-1ra)</b> | 69 pg/mL                      | 25 pg/mL              |
| <b>Interleukin-2 (IL-2)</b>                       | 8.3 pg/mL                     | 5.2 pg/mL             | <b>Interleukin-2 (IL-2)</b>                       | 41 pg/mL                      | 29 pg/mL              |
| <b>Interleukin-3 (IL-3)</b>                       | 0.016 ng/mL                   | 0.0057 ng/mL          | <b>Interleukin-3 (IL-3)</b>                       | 0.0051 ng/mL                  | 0.005 ng/mL           |
| <b>Interleukin-4 (IL-4)</b>                       | 29 pg/mL                      | 22 pg/mL              | <b>Interleukin-4 (IL-4)</b>                       | 35 pg/mL                      | 42 pg/mL              |
| <b>Interleukin-5 (IL-5)</b>                       | 13 pg/mL                      | 5.1 pg/mL             | <b>Interleukin-5 (IL-5)</b>                       | 4.7 pg/mL                     | 3.5 pg/mL             |
| <b>Interleukin-6 (IL-6)</b>                       | 11 pg/mL                      | 4.2 pg/mL             | <b>Interleukin-6 (IL-6)</b>                       | 4.5 pg/mL                     | 5 pg/mL               |
| <b>Interleukin-7 (IL-7)</b>                       | 8.8 pg/mL                     | 11 pg/mL              | <b>Interleukin-7 (IL-7)</b>                       | 32 pg/mL                      | 31 pg/mL              |
| <b>Interleukin-8 (IL-8)</b>                       | 4 pg/mL                       | 3.1 pg/mL             | <b>Interleukin-8 (IL-8)</b>                       | 2.9 pg/mL                     | 2.8 pg/mL             |
| <b>Interleukin-10 (IL-10)</b>                     | 6.9 pg/mL                     | 5.4 pg/mL             | <b>Interleukin-10 (IL-10)</b>                     | 6.8 pg/mL                     | 3.3 pg/mL             |
| <b>Interleukin-12 Subunit p40 (IL-12p40)</b>      | 0.28 ng/mL                    | 0.08 ng/mL            | <b>Interleukin-12 Subunit p40 (IL-12p40)</b>      | 0.13 ng/mL                    | 0.092 ng/mL           |
| <b>Interleukin-12 Subunit p70 (IL-12p70)</b>      | 49 pg/mL                      | 30 pg/mL              | <b>Interleukin-12 Subunit p70 (IL-12p70)</b>      | 50 pg/mL                      | 34 pg/mL              |
| <b>Interleukin-13 (IL-13)</b>                     | 6.2 pg/mL                     | 3.1 pg/mL             | <b>Interleukin-13 (IL-13)</b>                     | 6 pg/mL                       | 6.1 pg/mL             |
| <b>Interleukin-15 (IL-15)</b>                     | 0.39 ng/mL                    | 0.58 ng/mL            | <b>Interleukin-15 (IL-15)</b>                     | 0.44 ng/mL                    | 0.29 ng/mL            |
| <b>Interleukin-16 (IL-16)</b>                     | 87 pg/mL                      | 22 pg/mL              | <b>Interleukin-16 (IL-16)</b>                     | 26 pg/mL                      | 29 pg/mL              |
| <b>Interleukin-17 (IL-17)</b>                     | 5 pg/mL                       | 5.9 pg/mL             | <b>Interleukin-17 (IL-17)</b>                     | 2.9 pg/mL                     | 2.1 pg/mL             |
| <b>Interleukin-18 (IL-18)</b>                     | 41 pg/mL                      | 18 pg/mL              | <b>Interleukin-18 (IL-18)</b>                     | 12 pg/mL                      | 23 pg/mL              |
| <b>Interleukin-23 (IL-23)</b>                     | 0.4 ng/mL                     | 0.61 ng/mL            | <b>Interleukin-23 (IL-23)</b>                     | 1 ng/mL                       | 0.4 ng/mL             |
| <b>Leptin</b>                                     | 0.13 ng/mL                    | 0.054 ng/mL           | <b>Leptin</b>                                     | 0.15 ng/mL                    | 0.15 ng/mL            |

| 1st Batch Run (n = 62 samples)                               |                               |                       | 2nd Batch Run (n = 72 samples)                                                                             |                               |                     |
|--------------------------------------------------------------|-------------------------------|-----------------------|------------------------------------------------------------------------------------------------------------|-------------------------------|---------------------|
|                                                              | Lower Limit of Quantification | Least Detectable Dose |                                                                                                            | Lower Limit of Quantification | Least Detectable Do |
| <b>Macrophage-Derived Chemokine (MDC) Macrophage</b>         | 19 pg/mL                      | 6.1 pg/mL             | <b>Macrophage-Derived Chemokine (MDC) Macrophage Inflammatory Protein-1 alpha (MIP-1 alpha) Macrophage</b> | 20 pg/mL                      | 21 pg/mL            |
| <b>Inflammatory Protein-1 alpha (MIP-1 alpha) Macrophage</b> | 42 pg/mL                      | 41 pg/mL              | <b>Macrophage Inflammatory Protein-1 beta (MIP-1 beta) Macrophage</b>                                      | 29 pg/mL                      | 12 pg/mL            |
| <b>Inflammatory Protein-1 beta (MIP-1 beta) Macrophage</b>   | 31 pg/mL                      | 20 pg/mL              | <b>Macrophage Inflammatory Protein-1 beta (MIP-1 beta) Macrophage</b>                                      | 30 pg/mL                      | 17 pg/mL            |
| <b>Matrix Metalloproteinase-3 (MMP-3)</b>                    | 0.058 ng/mL                   | 0.033 ng/mL           | <b>Matrix Metalloproteinase-3 (MMP-3)</b>                                                                  | 0.081 ng/mL                   | 0.033 ng/mL         |
| <b>Matrix Metalloproteinase-9 (MMP-9)</b>                    | 40 ng/mL                      | 25 ng/mL              | <b>Matrix Metalloproteinase-9 (MMP-9)</b>                                                                  | 34 ng/mL                      | 18 ng/mL            |
| <b>Monocyte Chemotactic Protein 1 (MCP-1)</b>                | 45 pg/mL                      | 23 pg/mL              | <b>Monocyte Chemotactic Protein 1 (MCP-1)</b>                                                              | 56 pg/mL                      | 75 pg/mL            |
| <b>Myeloperoxidase (MPO)</b>                                 | 186 ng/mL                     | 162 ng/mL             | <b>Myeloperoxidase (MPO)</b>                                                                               | 27 ng/mL                      | 9 ng/mL             |
| <b>Myoglobin</b>                                             | 8.1 ng/mL                     | 2.2 ng/mL             | <b>Myoglobin</b>                                                                                           | 4.6 ng/mL                     | 3.2 ng/mL           |
| <b>Neuron-Specific Enolase (NSE)</b>                         | 0.18 ng/mL                    | 0.15 ng/mL            | <b>Neuron-Specific Enolase (NSE)</b>                                                                       | 0.25 ng/mL                    | 0.36 ng/mL          |
| <b>Plasminogen Activator Inhibitor 1 (PAI-1)</b>             | 3.1 ng/mL                     | 1.6 ng/mL             | <b>Plasminogen Activator Inhibitor 1 (PAI-1)</b>                                                           | 1.9 ng/mL                     | 1.1 ng/mL           |
| <b>Prostate-Specific Antigen, Free (PSA-f)</b>               | 0.013 ng/mL                   | 0.0027 ng/mL          | <b>Prostate-Specific Antigen, Free (PSA-f)</b>                                                             | 0.017 ng/mL                   | 0.013 ng/mL         |
| <b>Serotransferrin (Transferrin)</b>                         | 47 mg/dl                      | 6.9 mg/dl             | <b>Pulmonary and Activation-Regulated Chemokine (PARC)</b>                                                 | 0.81 ng/mL                    | 0.69 ng/mL          |
| <b>Serum Amyloid P-Component (SAP)</b>                       | 0.072 ug/mL                   | 0.057 ug/mL           | <b>Serotransferrin (Transferrin)</b>                                                                       | 38 mg/dl                      | 12 mg/dl            |
| <b>Sex Hormone-Binding Globulin (SHBG)</b>                   | 5.1 nmol/L                    | 1.9 nmol/L            | <b>Serum Amyloid P-Component (SAP)</b>                                                                     | 0.053 ug/mL                   | 0.038 ug/mL         |
| <b>Stem Cell Factor (SCF)</b>                                | 116 pg/mL                     | 92 pg/mL              | <b>Stem Cell Factor (SCF)</b>                                                                              | 142 pg/mL                     | 84 pg/mL            |
| <b>T-Cell-Specific Protein RANTES (RANTES)</b>               | 0.21 ng/mL                    | 0.036 ng/mL           | <b>T-Cell-Specific Protein RANTES (RANTES)</b>                                                             | 0.047 ng/mL                   | 0.051 ng/mL         |
| <b>Thrombospondin-1</b>                                      | 17 ng/mL                      | 6.1 ng/mL             | <b>Thrombospondin-1</b>                                                                                    | 34 ng/mL                      | 11 ng/mL            |
| <b>Thyroid-Stimulating Hormone (TSH)</b>                     | 0.039 uIU/mL                  | 0.018 uIU/mL          | <b>Thyroid-Stimulating Hormone (TSH)</b>                                                                   | 0.065 uIU/mL                  | 0.036 uIU/mL        |
| <b>Thyroxine-Binding Globulin (TBG)</b>                      | 0.18 ug/mL                    | 0.095 ug/mL           | <b>Thyroxine-Binding Globulin (TBG)</b>                                                                    | 0.42 ug/mL                    | 0.14 ug/mL          |
| <b>Tissue Inhibitor of Metalloproteinases 1 (TIMP-1)</b>     | 3.2 ng/mL                     | 2.1 ng/mL             | <b>Tissue Inhibitor of Metalloproteinases 1 (TIMP-1)</b>                                                   | 3 ng/mL                       | 3.2 ng/mL           |
| <b>Transthyretin (TTR)</b>                                   | 4 mg/dl                       | 0.95 mg/dl            | <b>Transthyretin (TTR)</b>                                                                                 | 0.6 mg/dl                     | 0.45 mg/dl          |
| <b>Tumor Necrosis Factor alpha (TNF-alpha)</b>               | 23 pg/mL                      | 14 pg/mL              | <b>Tumor Necrosis Factor alpha (TNF-alpha)</b>                                                             | 14 pg/mL                      | 26 pg/mL            |
| <b>Tumor Necrosis Factor beta (TNF-beta)</b>                 | 9.7 pg/mL                     | 11 pg/mL              | <b>Tumor Necrosis Factor beta (TNF-beta)</b>                                                               | 45 pg/mL                      | 32 pg/mL            |
| <b>Tumor necrosis factor receptor 2 (TNFR2)</b>              | 1.1 ng/mL                     | 0.21 ng/mL            | <b>Tumor necrosis factor receptor 2 (TNFR2)</b>                                                            | 1 ng/mL                       | 0.29 ng/mL          |
| <b>Vascular Cell Adhesion Molecule-1 (VCAM-1)</b>            | 11 ng/mL                      | 1.8 ng/mL             | <b>Vascular Cell Adhesion Molecule-1 (VCAM-1)</b>                                                          | 2.2 ng/mL                     | 1.6 ng/mL           |
| <b>Vascular Endothelial Growth Factor (VEGF)</b>             | 34 pg/mL                      | 62 pg/mL              | <b>Vascular Endothelial Growth Factor (VEGF)</b>                                                           | 38 pg/mL                      | 24 pg/mL            |
| <b>Vitamin D-Binding Protein (VDBP)</b>                      | 5.6 ug/mL                     | 4.1 ug/mL             | <b>Vitamin D-Binding Protein (VDBP)</b>                                                                    | 9.8 ug/mL                     | 3 ug/mL             |
| <b>von Willebrand Factor (vWF)</b>                           | 17 ug/mL                      | 7.8 ug/mL             | <b>von Willebrand Factor (vWF)</b>                                                                         | 12 ug/mL                      | 5.2 ug/mL           |
